# Supplementary material for: Impact of virtual monoenergetic levels on coronary plaque volume components using photon-counting computed tomography
Source: PubMed Central journal article supplement (PMC10667372; doi:10.1007/s00330-023-09876-7), 2023-07-24
Supplement: 330_2023_9876_MOESM1_ESM.pdf [file 330_2023_9876_MOESM1_ESM.pdf]

## Impact of Virtual Monoenergetic Levels on Coronary Plaque Volume Components using Photon-Counting Computed Tomography

### ELECTRONIC SUPPLEMENTARY MATERIAL

**Supplementary table 1.** Average attenuation and image quality values (SD, CNR, SNR) across different VMI energy levels and T3D images.

| Energy level (keV) | Attenuation (HU) |     | Image noise (SD) |    | CNR  |     | SNR  |     |
|--------------------|------------------|-----|------------------|----|------|-----|------|-----|
|                    | Mean             | SD  | Mean             | SD | Mean | SD  | Mean | SD  |
| T3D                | 299              | 209 | 35               | 5  | 15.5 | 3.7 | 13.1 | 3.6 |
| 40                 | 723              | 501 | 72               | 12 | 22.1 | 5.6 | 20.0 | 5.5 |
| 50                 | 509              | 361 | 55               | 9  | 19.4 | 4.9 | 17.2 | 4.7 |
| 60                 | 382              | 277 | 45               | 7  | 17.2 | 4.0 | 14.8 | 3.8 |
| 70                 | 303              | 225 | 37               | 6  | 15.8 | 3.5 | 13.2 | 3.2 |
| 80                 | 247              | 190 | 35               | 5  | 13.2 | 3.2 | 10.7 | 2.8 |
| 90                 | 210              | 167 | 34               | 5  | 11.1 | 2.9 | 8.8  | 2.4 |
| 100                | 184              | 151 | 34               | 6  | 9.5  | 2.5 | 7.3  | 2.1 |
| 110                | 167              | 140 | 33               | 6  | 8.4  | 2.3 | 6.3  | 1.8 |
| 120                | 154              | 132 | 33               | 6  | 7.6  | 2.1 | 5.4  | 1.6 |
| 130                | 144              | 127 | 33               | 6  | 6.9  | 1.9 | 4.8  | 1.5 |
| 140                | 137              | 122 | 33               | 6  | 6.4  | 1.8 | 4.4  | 1.4 |
| 150                | 131              | 119 | 33               | 6  | 6.0  | 1.8 | 4.0  | 1.3 |
| 160                | 127              | 116 | 33               | 6  | 5.7  | 1.7 | 3.7  | 1.3 |
| 170                | 123              | 114 | 33               | 6  | 5.5  | 1.7 | 3.5  | 1.2 |
| 180                | 120              | 112 | 33               | 6  | 5.3  | 1.6 | 3.3  | 1.2 |

CNR: Contrast-to-noise ratio; CP: Calcified plaque; HU: Hounsfield unit; SD: Standard deviation; SNR: Signal-to-noise ratio

**Supplementary table 2.** Average plaque volumes and their proportion to total plaque volume (%) across different VMI energy levels and T3D images using the thresholds of method 1 for plaque characterization.

CP: Calcified plaque; HU: Hounsfield unit; LAP: Low-attenuation non-calcified plaque; NCP: Non-calcified plaque; SD: Standard deviation; TPV: Total plaque volume on T3D images

Total plaque volume on T3D images

| Energy level (keV) | CP volume (>350 HU)     |                       |                               | NCP volume (31 - 350 HU) |                       |                               | LAP volume (-100 - 30 HU) |                       |                               |
|--------------------|-------------------------|-----------------------|-------------------------------|--------------------------|-----------------------|-------------------------------|---------------------------|-----------------------|-------------------------------|
|                    | Mean (mm <sup>3</sup> ) | SD (mm <sup>3</sup> ) | Proportion of mean to TPV (%) | Mean (mm <sup>3</sup> )  | SD (mm <sup>3</sup> ) | Proportion of mean to TPV (%) | Mean (mm <sup>3</sup> )   | SD (mm <sup>3</sup> ) | Proportion of mean to TPV (%) |
| T3D                | 81.2                    | 110.1                 | 30.0                          | 161.0                    | 126.3                 | 59.6                          | 28.0                      | 30.8                  | 10.4                          |
| 40                 | 138.7                   | 126.4                 | 51.3                          | 96.9                     | 86.8                  | 35.9                          | 22.8                      | 24.9                  | 8.4                           |
| 50                 | 111.1                   | 121.5                 | 41.1                          | 128.3                    | 106.9                 | 47.5                          | 28.6                      | 30.1                  | 10.6                          |
| 60                 | 88.2                    | 113.3                 | 32.6                          | 149.9                    | 120.1                 | 55.5                          | 31.8                      | 32.9                  | 11.8                          |
| 70                 | 81.9                    | 111.4                 | 30.3                          | 152.8                    | 122.0                 | 56.6                          | 35.5                      | 35.0                  | 13.1                          |
| 80                 | 75.9                    | 105.1                 | 28.1                          | 149.3                    | 120.7                 | 55.3                          | 45.0                      | 41.4                  | 16.7                          |
| 90                 | 67.0                    | 95.6                  | 24.8                          | 149.1                    | 123.0                 | 55.2                          | 54.1                      | 47.6                  | 20.0                          |
| 100                | 58.9                    | 87.1                  | 21.8                          | 148.8                    | 122.6                 | 55.1                          | 62.5                      | 53.3                  | 23.1                          |
| 110                | 53.0                    | 81.0                  | 19.6                          | 147.2                    | 120.9                 | 54.5                          | 69.9                      | 58.4                  | 25.9                          |
| 120                | 48.8                    | 76.5                  | 18.1                          | 145.2                    | 118.9                 | 53.7                          | 76.0                      | 62.7                  | 28.1                          |
| 130                | 45.9                    | 73.1                  | 17.0                          | 143.0                    | 117.1                 | 52.9                          | 81.1                      | 66.3                  | 30.0                          |
| 140                | 43.6                    | 70.4                  | 16.1                          | 141.0                    | 115.5                 | 52.2                          | 85.4                      | 69.3                  | 31.6                          |
| 150                | 41.9                    | 68.5                  | 15.5                          | 139.2                    | 114.3                 | 51.5                          | 88.9                      | 71.5                  | 32.9                          |
| 160                | 40.5                    | 66.9                  | 15.0                          | 137.7                    | 113.3                 | 51.0                          | 91.8                      | 73.5                  | 34.0                          |
| 170                | 39.4                    | 65.6                  | 14.6                          | 136.4                    | 112.6                 | 50.5                          | 94.1                      | 75.0                  | 34.8                          |
| 180                | 38.5                    | 64.6                  | 14.3                          | 135.4                    | 111.9                 | 50.1                          | 96.0                      | 76.3                  | 35.5                          |

**Supplementary table 3.** Average plaque volumes and their proportion to total plaque volume (%) across different VMI energy levels and T3D images using the thresholds of method 2 for plaque characterization.

| Energy level (keV) | CP volume (>130 HU)     |                       |                               | NCP volume (31 - 130 HU) |                       |                               | LAP volume (<30 HU)     |                       |                               |
|--------------------|-------------------------|-----------------------|-------------------------------|--------------------------|-----------------------|-------------------------------|-------------------------|-----------------------|-------------------------------|
|                    | Mean (mm <sup>3</sup> ) | SD (mm <sup>3</sup> ) | Proportion of mean to TPV (%) | Mean (mm <sup>3</sup> )  | SD (mm <sup>3</sup> ) | Proportion of mean to TPV (%) | Mean (mm <sup>3</sup> ) | SD (mm <sup>3</sup> ) | Proportion of mean to TPV (%) |
| T3D                | 153.4                   | 138.4                 | 56.8                          | 88.8                     | 82.2                  | 32.9                          | 28.1                    | 30.8                  | 10.4                          |
| 40                 | 205.0                   | 164.2                 | 75.9                          | 30.6                     | 31.3                  | 11.3                          | 27.5                    | 29.9                  | 10.2                          |
| 50                 | 194.0                   | 161.6                 | 71.8                          | 45.4                     | 43.9                  | 16.8                          | 30.7                    | 32.3                  | 11.4                          |
| 60                 | 172.6                   | 150.3                 | 63.9                          | 65.6                     | 60.5                  | 24.3                          | 32.1                    | 33.3                  | 11.9                          |
| 70                 | 147.2                   | 138.3                 | 54.5                          | 87.4                     | 79.4                  | 32.4                          | 35.6                    | 35.1                  | 13.2                          |
| 80                 | 123.1                   | 127.5                 | 45.6                          | 102.1                    | 90.3                  | 37.8                          | 45.0                    | 41.5                  | 16.7                          |
| 90                 | 106.8                   | 120.9                 | 39.5                          | 109.3                    | 93.2                  | 40.5                          | 54.2                    | 47.6                  | 20.1                          |
| 100                | 97.4                    | 117.6                 | 36.1                          | 110.3                    | 92.5                  | 40.8                          | 62.6                    | 53.4                  | 23.2                          |
| 110                | 91.7                    | 115.6                 | 33.9                          | 108.5                    | 90.7                  | 40.2                          | 70.0                    | 58.5                  | 25.9                          |
| 120                | 88.1                    | 114.3                 | 32.6                          | 106.0                    | 88.6                  | 39.2                          | 76.2                    | 62.8                  | 28.2                          |
| 130                | 85.5                    | 112.9                 | 31.6                          | 103.4                    | 86.8                  | 38.3                          | 81.3                    | 66.5                  | 30.1                          |
| 140                | 83.5                    | 111.8                 | 30.9                          | 101.1                    | 85.4                  | 37.4                          | 85.6                    | 69.4                  | 31.7                          |
| 150                | 81.8                    | 110.7                 | 30.3                          | 99.3                     | 84.4                  | 36.8                          | 89.1                    | 71.6                  | 33.0                          |
| 160                | 80.4                    | 109.7                 | 29.8                          | 97.7                     | 83.6                  | 36.1                          | 92.1                    | 73.6                  | 34.1                          |
| 170                | 79.3                    | 108.9                 | 29.4                          | 96.5                     | 83.0                  | 35.7                          | 94.4                    | 75.1                  | 34.9                          |
| 180                | 78.3                    | 108.2                 | 29.0                          | 95.6                     | 82.4                  | 35.4                          | 96.3                    | 76.5                  | 35.6                          |

CP: Calcified plaque; HU: Hounsfield unit; LAP: Low-attenuation non-calcified plaque; NCP: Non-calcified plaque; SD: Standard deviation; TPV: Total plaque volume on T3D images
